# Supplementary material for: High Mechanical and Thermal Properties of Epoxy Composites with Liquid Crystalline Polyurethane Modified Graphene
Source: MDPI journal article supplement (doi:10.3390/polym10050485), 2018-05-01
Supplement: s1 [file s1]

# High mechanical and thermal properties of epoxy composites with liquid crystalline polyurethane modified graphene

Yuqi Li\*, Jian Gao<sup>#</sup>, Xiuyun Li, Xu Xu and Shaorong Lu\*

Key Laboratory of New Processing Technology for Nonferrous Metals and Materials, Ministry of Education, College of Materials Science and Engineering, Guilin University of Technology, Guilin 541004, China.

\*Correspondence: liyuqi@glut.edu.cn; lushaor@163.com

<sup>#</sup>These authors contributed equally to this work.

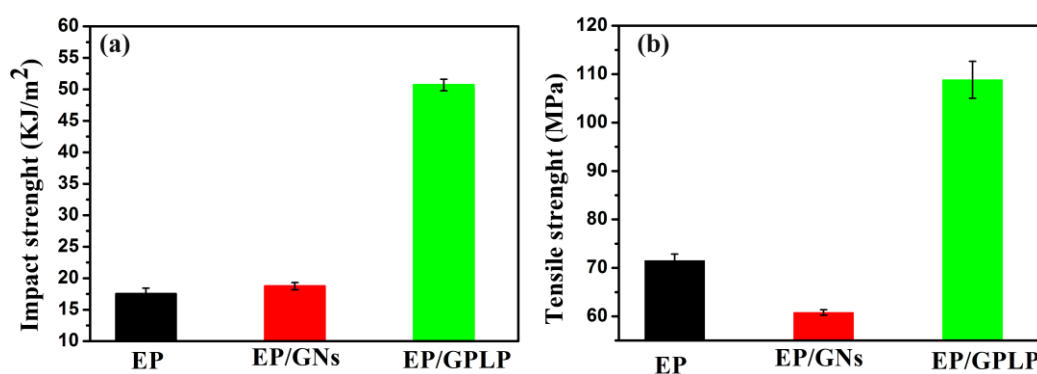

Figure s1 (a) Impact strength and tensile strength of EP, EP/GNs and (b) EP/GPLP composites (GNs 1.47 wt %).
